# Supplementary material for: Exploration of CH⋯F & CF⋯H mediated supramolecular arrangements into fluorinated terphenyls and theoretical prediction of their third-order nonlinear optical response
Source: Royal Society of Chemistry journal article supplement (doi:10.1039/d0ra08528f), 2021-01-01
Supplement: d0ra08528f1.pdf [file d0ra08528f1.pdf]

## Exploration of CH••F & CF••H Mediated Supramolecular Arrangements into Fluorinated Terphenyls and Theoretical Prediction of Their Third-order Nonlinear Optical Response

Muhammad Adeel,<sup>§\*a</sup> Muhammad Khalid,<sup>§\*b</sup> Malik Aman Ullah,<sup>a</sup> Shabbir Muhammad,<sup>c,d</sup> Muhammad Usman Khan,<sup>e,f</sup> Muhammad Nawaz Tahir,<sup>g</sup> Ilham Khan,<sup>a</sup> Muhammad Asghar Hashmi,<sup>h</sup> Khawar Shahzad Mughal<sup>b</sup>

<sup>a</sup>*Institute of Chemical Sciences, Gomal University, Dera Ismail Khan, Khyber Pukhtunkhwa, Pakistan*

<sup>b</sup>*Department of Chemistry, Khwaja Fareed University of Engineering & Information Technology, Rahim Yar Khan-64200, Pakistan*

<sup>c</sup>*Department of Physics, College of Science, King Khalid University, Abha 61413, P.O. Box 9004, Saudi Arabia.*

<sup>d</sup>*Research Center for Advanced Material Science (RCAMS), King Khalid University, Abha 61413, P.O. Box 9004, Saudi Arabia.*

<sup>e</sup>*Department of Chemistry, University of Okara, Okara-56300, Pakistan*

<sup>f</sup>*Department of Applied Chemistry, Government College University, Faisalabad-38000, Pakistan*

<sup>g</sup>*Department of Physics, University of Sargodha, Sargodha, Punjab, Pakistan*

<sup>h</sup>*Department of Physics, Khwaja Fareed University of Engineering & Information Technology, Rahim Yar Khan-64200, Pakistan*

<sup>§</sup>Both authors contributed equally to this work.

Corresponding authors, E-mail addresses:[khalid@iq.usp.br](mailto:khalid@iq.usp.br) ,

[muhhammad.khalid@kfueit.edu.pk](mailto:muhhammad.khalid@kfueit.edu.pk) (Dr. M. Khalid) & [madeel@gu.edu.pk](mailto:madeel@gu.edu.pk) (Dr. M. Adeel).

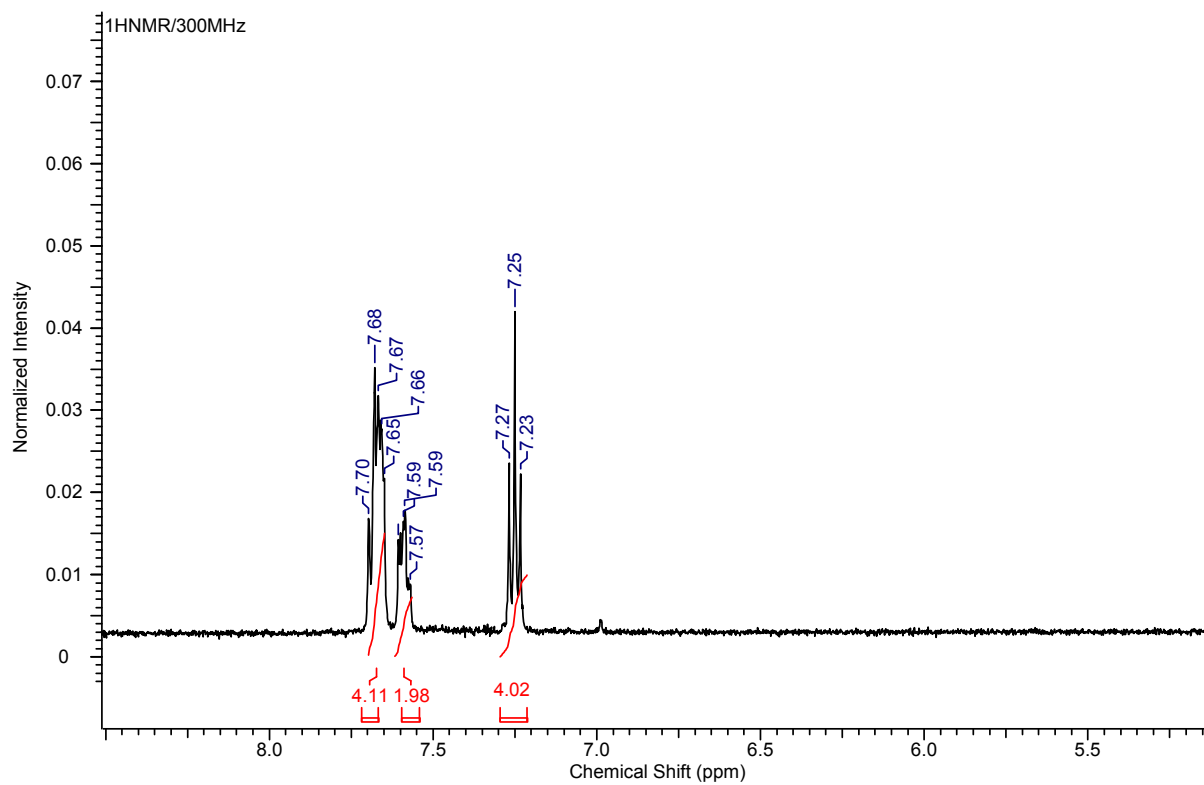

**Figure S1:** The <sup>1</sup>H-NMR spectra for compounds **1**.

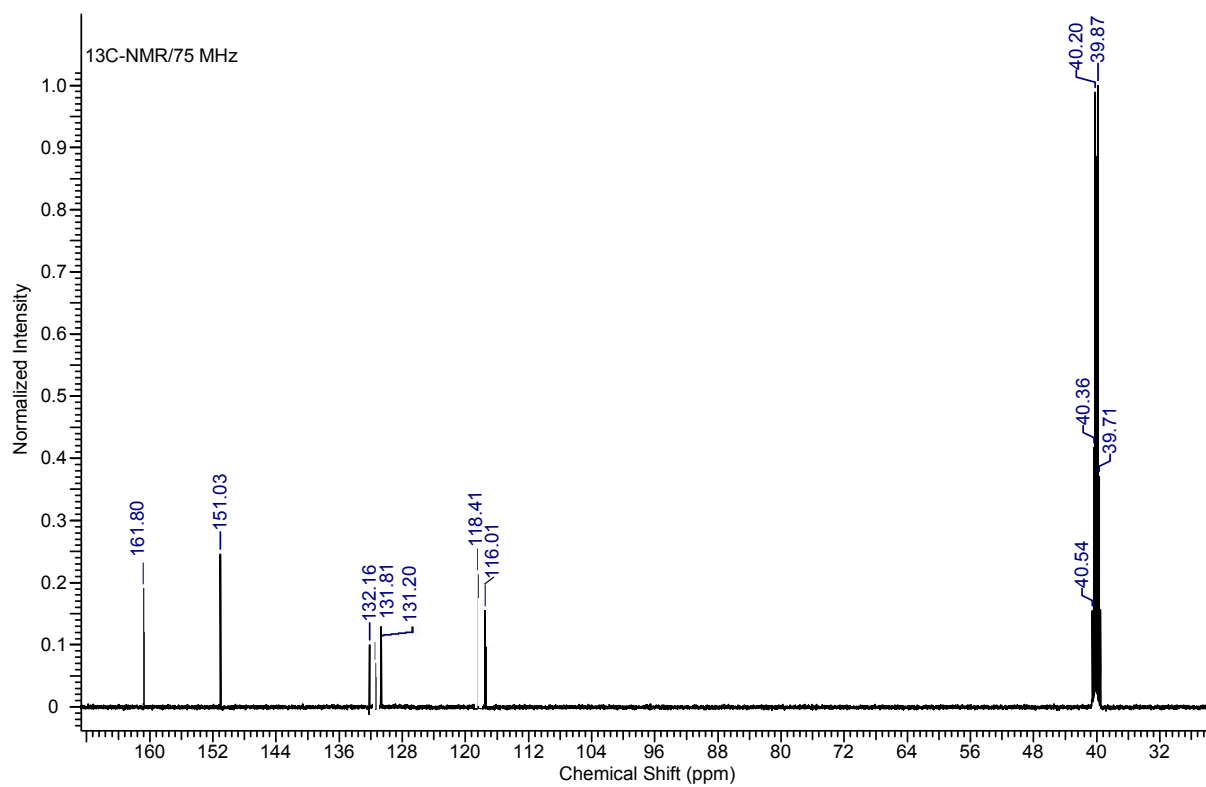

**Figure S2:** The <sup>13</sup>C-NMR spectra for compounds **1**.

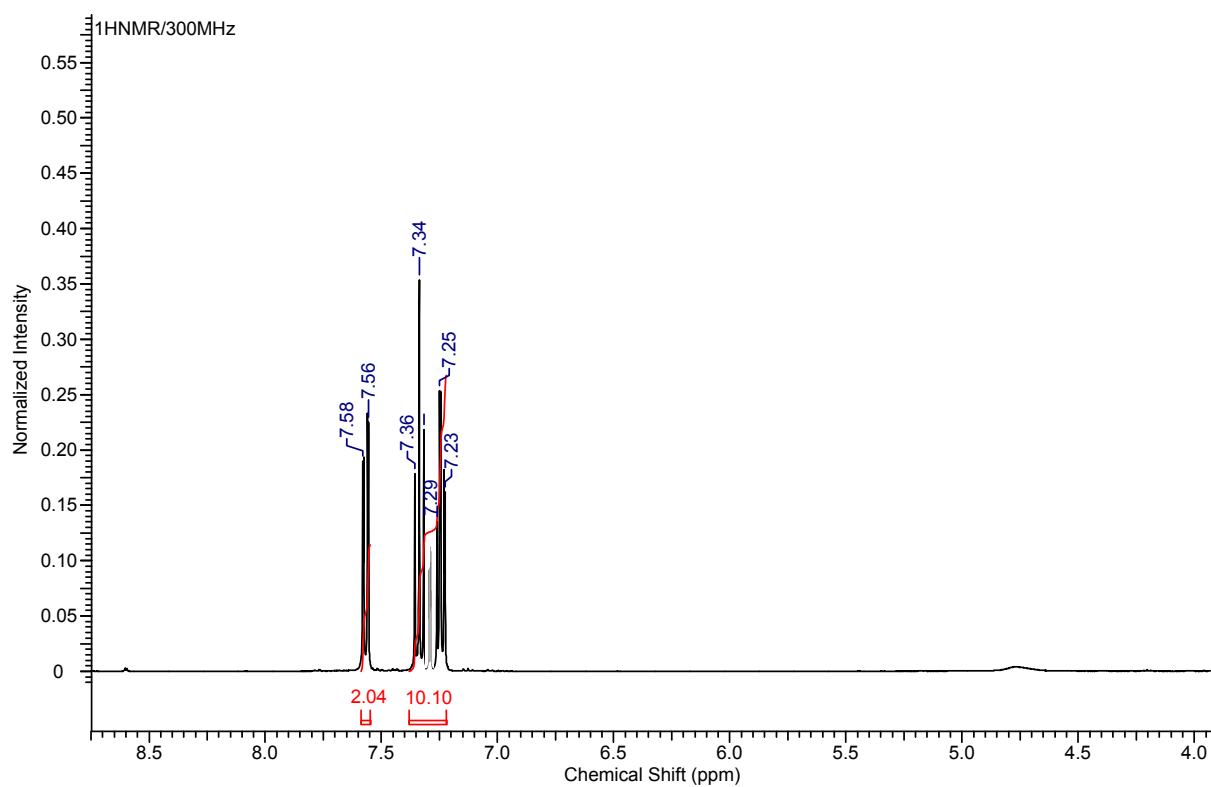

**Figure S3:** The <sup>1</sup>H-NMR spectra for compounds **2**.

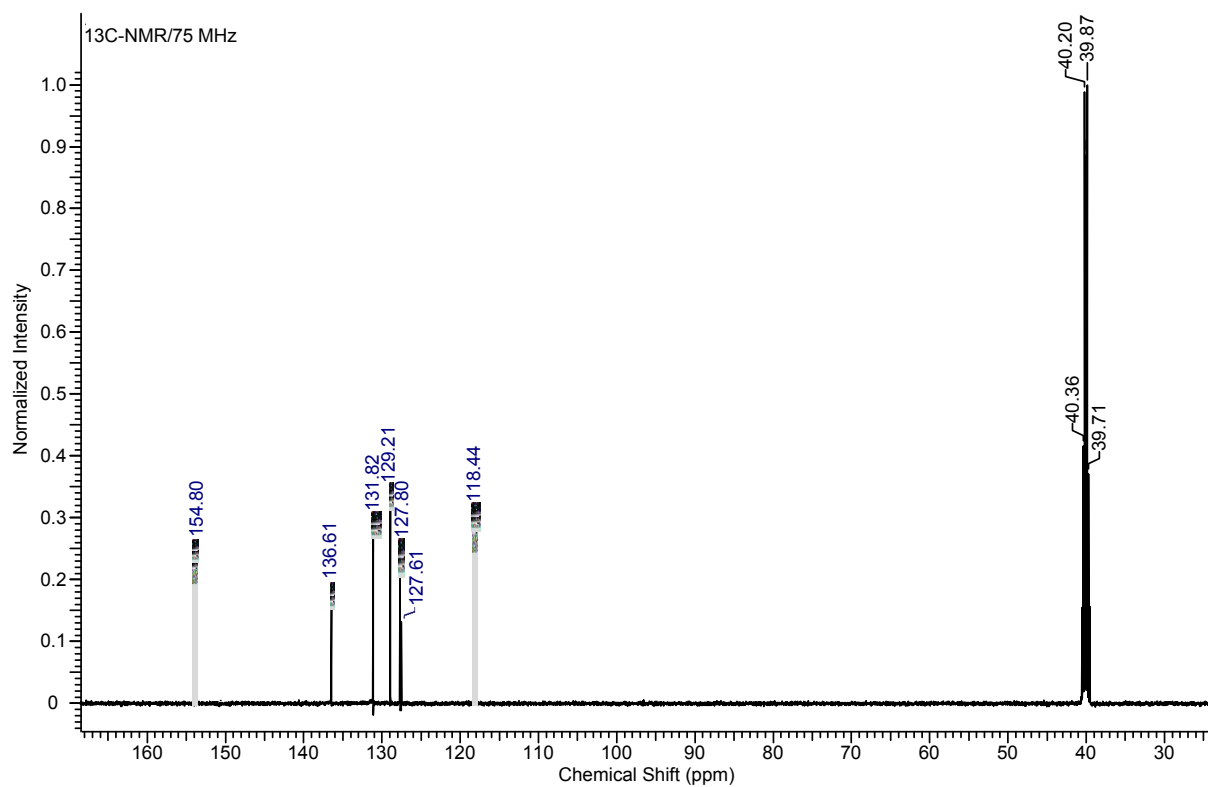

**Figure S4:** The <sup>13</sup>C-NMR spectra for compounds **2**.

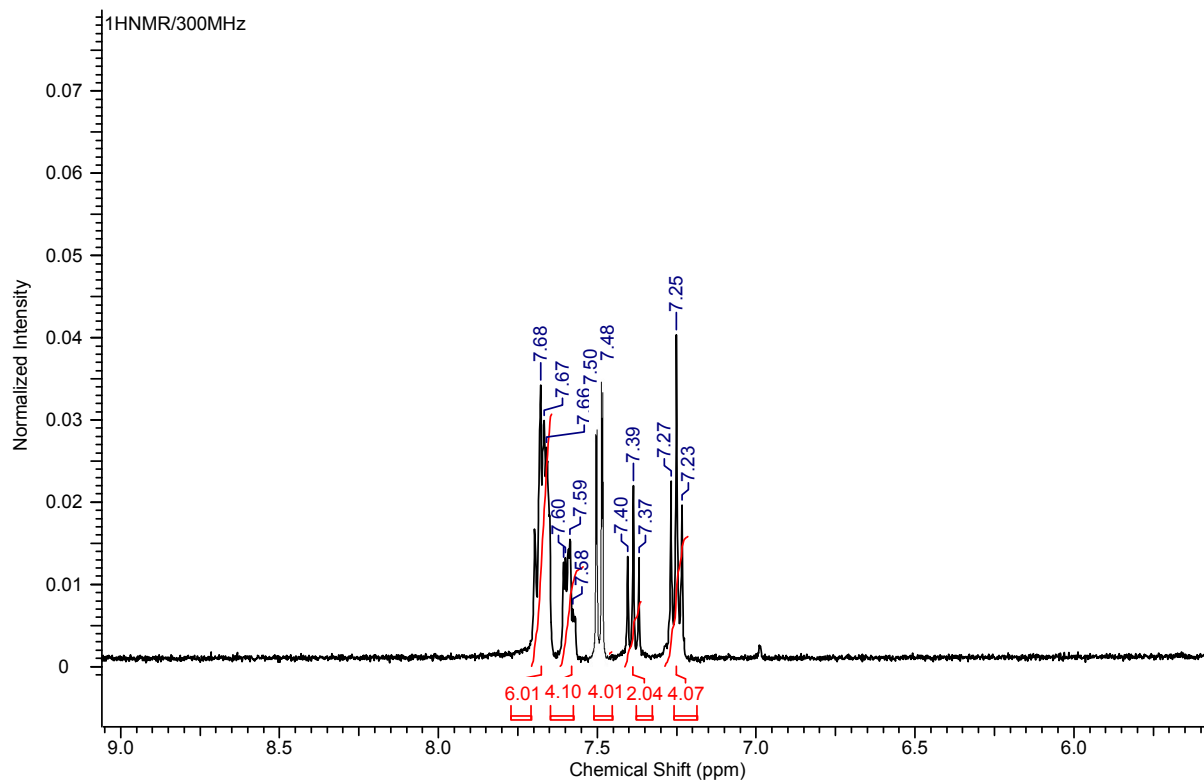

**Figure S5:** The <sup>1</sup>H-NMR spectra for compounds **3**.

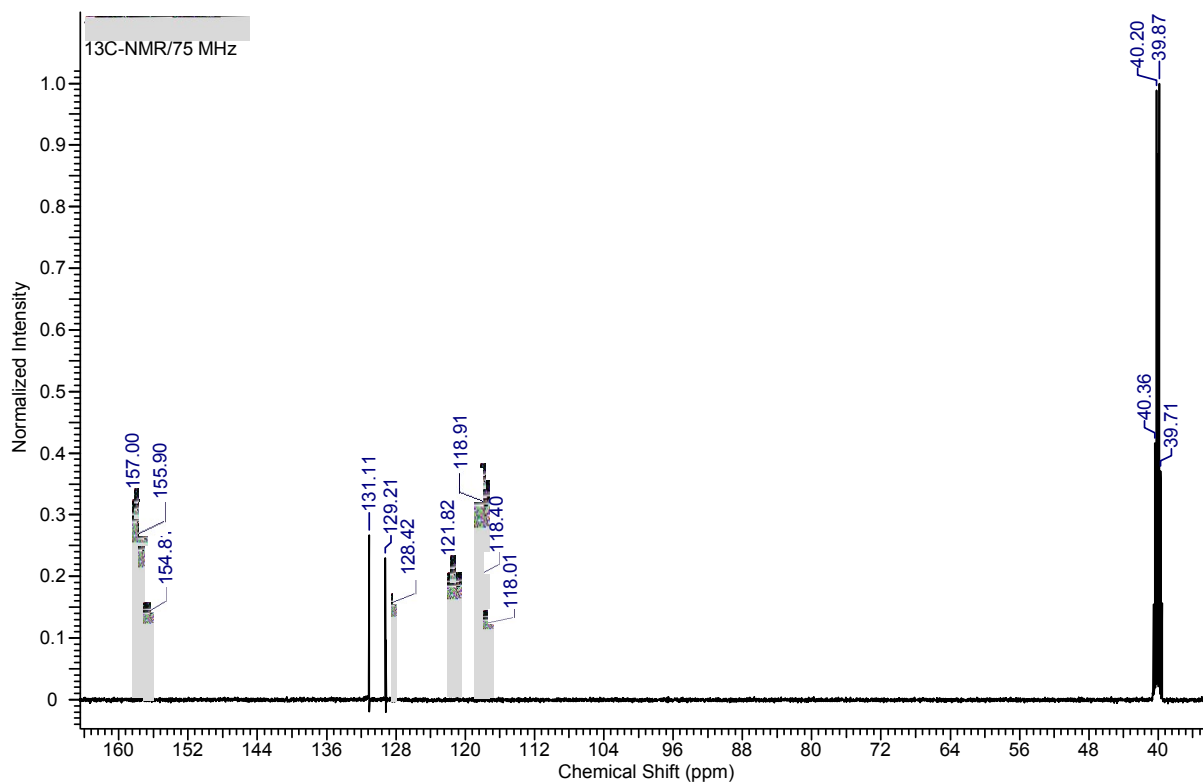

**Figure S6:** The <sup>13</sup>C-NMR spectra for compounds **3**.

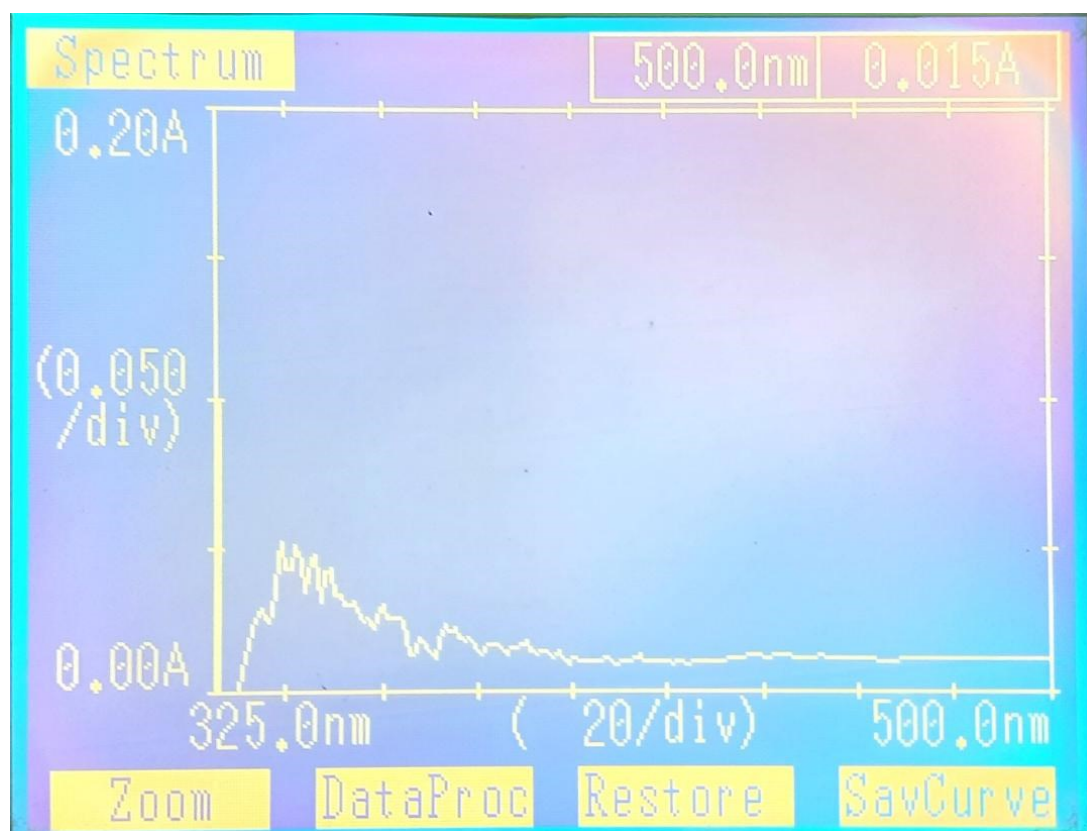

**Figure S7:** The UV spectrum for compound **1**.

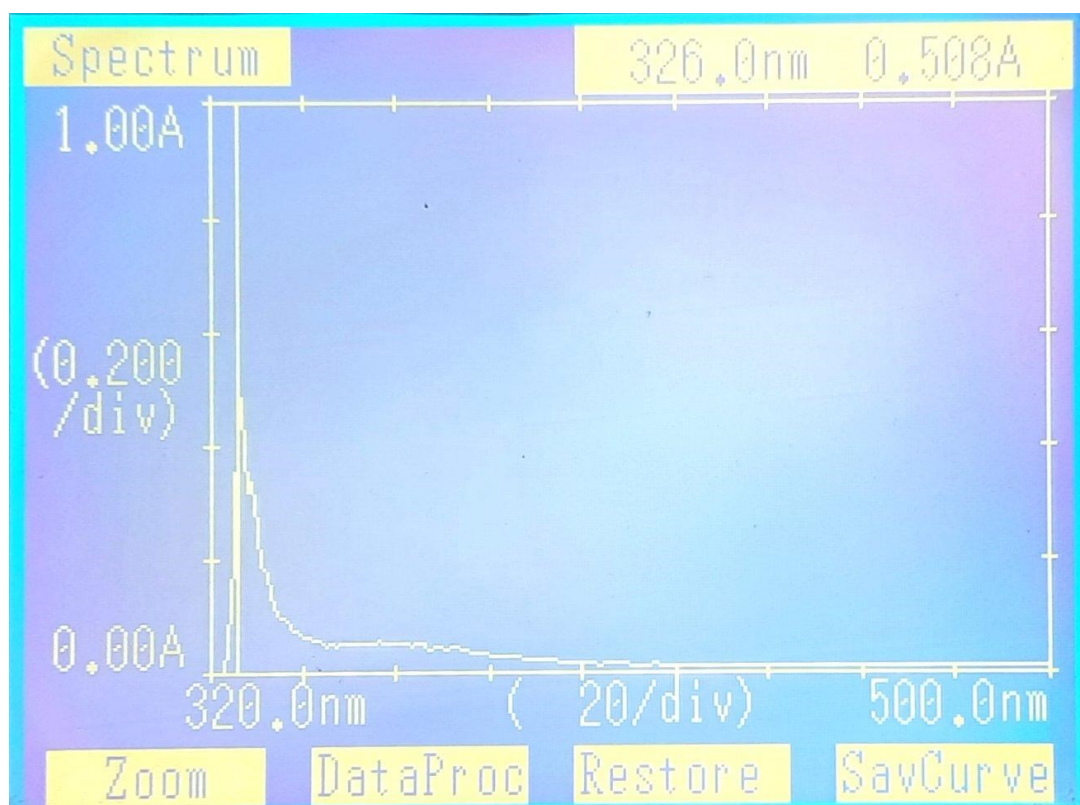

**Figure S8:** The UV spectrum for compound 2.

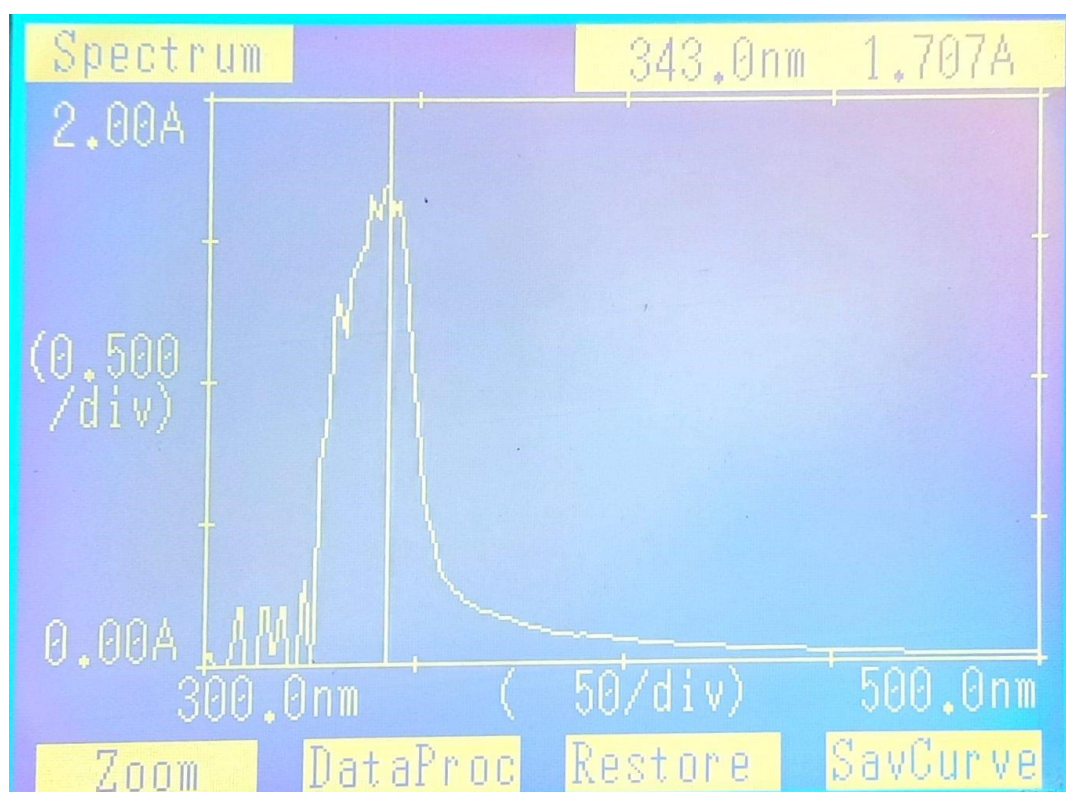

**Figure S9:** The UV spectrum for compound 3.



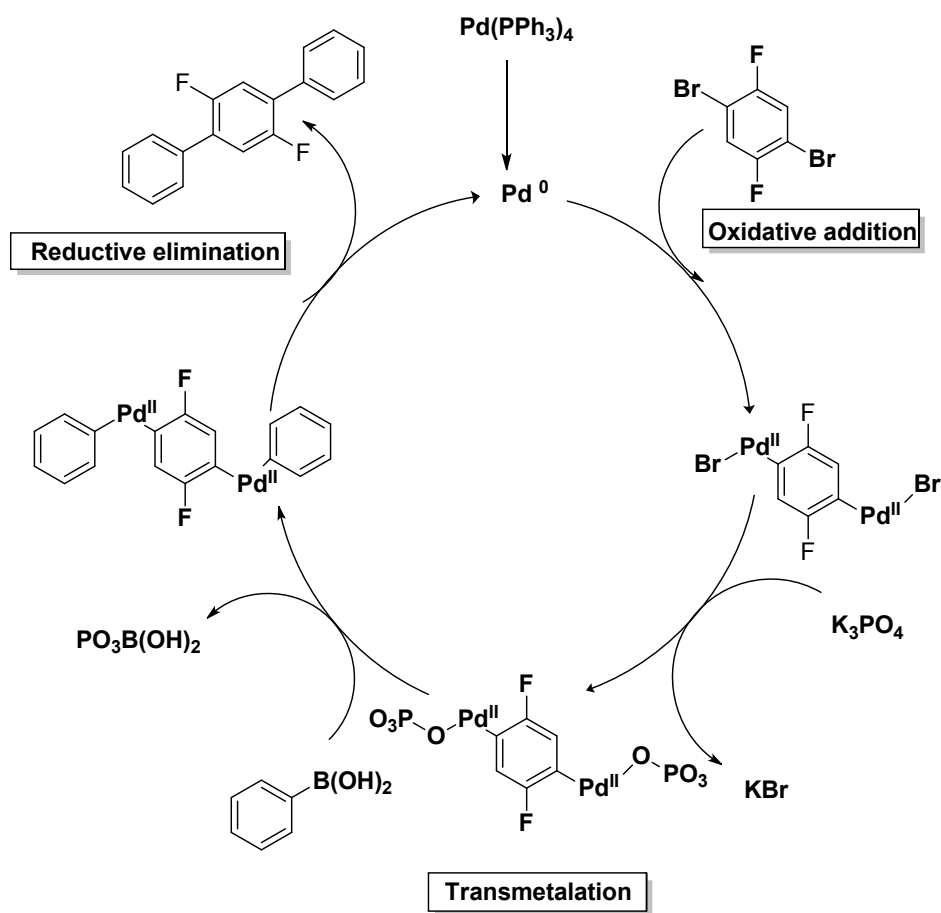

**Scheme S1:** General Suzuki Miyaura mechanism for the synthesis of terphenyl using  $\text{Pd}^0$  catalyst
